# Supplementary material
Source: PubMed Central journal article supplement (PMC4048703)
Supplement: NIHMS578589-supplement-1.pdf [file NIHMS578589-supplement-1.pdf]

**Supplementary Table I: Pro-inflammatory responses induced by LPS.**

| Cell subset       | Outcome                   | Age of participants (weeks) |                             |                              | Overall p value |
|-------------------|---------------------------|-----------------------------|-----------------------------|------------------------------|-----------------|
|                   |                           | 0                           | 10                          | 36                           |                 |
|                   |                           | Median (IQR)                | Median (IQR)                | Median (IQR)                 |                 |
| <b>Monocytes</b>  | IL-12 (iMFI)              | 94<br>(7-273)               | 1,032<br>(268-3417)         | 2,808<br>(1,516-8,388)       | <0.0001         |
|                   | IL-6 (iMFI)               | 71,884<br>(28,205-133,938)  | 222,762<br>(55,449-354,329) | 273,949<br>(165,056-353,423) | 0.0003          |
|                   | TNF- $\alpha$ (iMFI)      | 5,960<br>(917-11,397)       | 77,121<br>(21,797-138,869)  | 89,839<br>(44,320-187,420)   | <0.0001         |
|                   | IL-10 (iMFI)              | 251<br>(121-614)            | 295<br>(116-696)            | 481<br>(169-941)             | 0.4             |
|                   | Polyfunctional cells (%)* | 0.02<br>(0.01-0.05)         | 0.13<br>(0.01-1.21)         | 1.23<br>(0.21-3.91)          | <0.0001         |
|                   | Bifunctional cells (%)*   | 1.12<br>(0.41-2.01)         | 10.21<br>(3.13-18.32)       | 12.40<br>(5.91-19.19)        | <0.0001         |
|                   | Monofunctional cells (%)* | 36.79<br>(15.91-52.80)      | 53.20<br>(31.71-62.83)      | 50.24<br>(40.24-57.11)       | 0.1             |
| <b>Myeloid DC</b> | IL-12 (iMFI)              | 3<br>(0-683)                | 1046<br>(430-3,251)         | 774<br>(416-3,412)           | 0.0007          |
|                   | IL-6 (iMFI)               | 77,009<br>(45,854-127,398)  | 151,246<br>(55,226-249,850) | 95,355<br>(33,245-176,531)   | 0.2             |
|                   | TNF- $\alpha$ (iMFI)      | 26,253<br>(10,483-65,334)   | 154,201<br>(53,866-285,420) | 48,437<br>(27,523-170,017)   | 0.0001          |
|                   | IL-10 (iMFI)              | 110<br>(7-326)              | 74<br>(38-248)              | 73<br>(26-219)               | 0.7             |
|                   | Polyfunctional cells (%)* | 0.14<br>(0.04-0.29)         | 0.48<br>(0.18-2.60)         | 0.77<br>(0.30-3.18)          | 0.004           |
|                   | Bifunctional cells (%)*   | 4.62<br>(3.40-10.37)        | 19.56<br>(8.22-30.86)       | 9.97<br>(3.30-24.54)         | 0.008           |
|                   | Monofunctional cells (%)* | 34.90<br>(20.30-39.42)      | 25.25<br>(17.04-32.54)      | 17.87<br>(5.23-28.69)        | 0.0006          |

\*Amongst pro-inflammatory cytokine<sup>+</sup> cells. The Kruskal-Wallis test was used for statistical analyses (overall p-values). iMFI, integrated median fluorescence intensity.

## Supplementary Figure 1

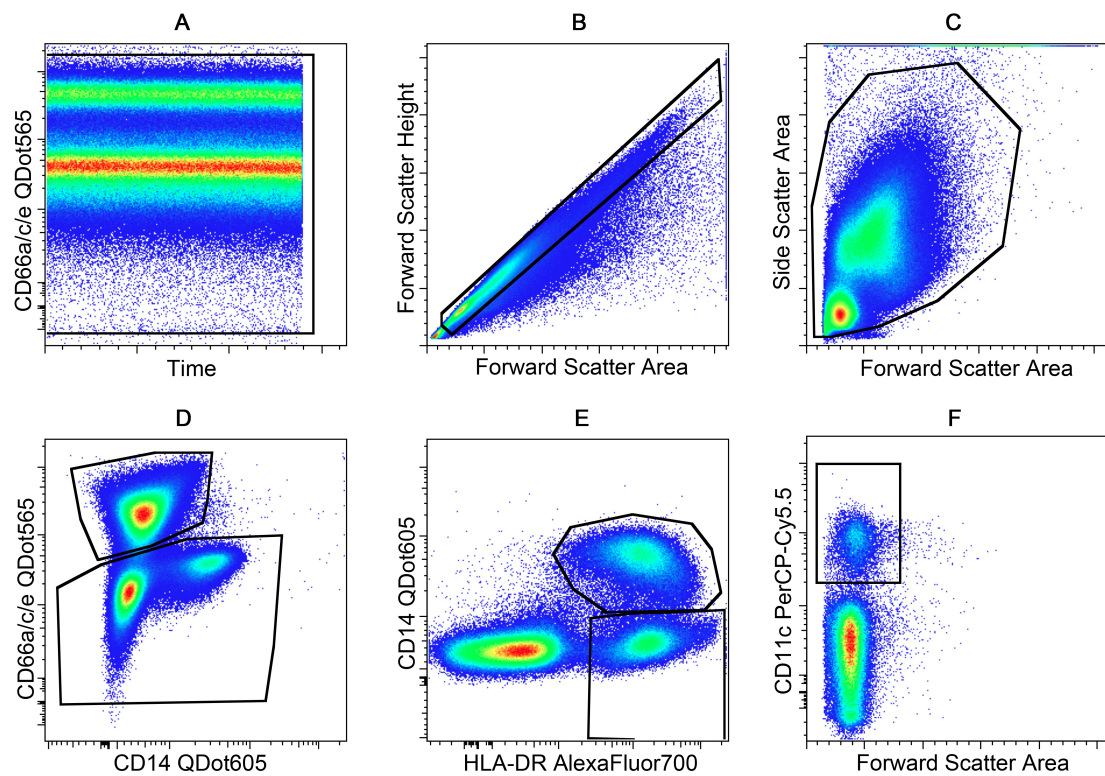

**Supplementary Figure 1: Gating strategy of whole blood innate ICS assay.** (A) Time gate to ensure uniform fluorescence over time during acquisition. (B) Singlet gate to exclude cell doublets. (C) Leukocyte gate. (D) Identification of CD66a/c/e<sup>+</sup> granulocytes. (E) Identification of CD14<sup>+</sup> HLA-DR<sup>+</sup> monocytes. (F) Identification of CD14<sup>-</sup>HLA-DR<sup>+</sup>CD11c<sup>+</sup> mDC.

## Supplementary Figure 2

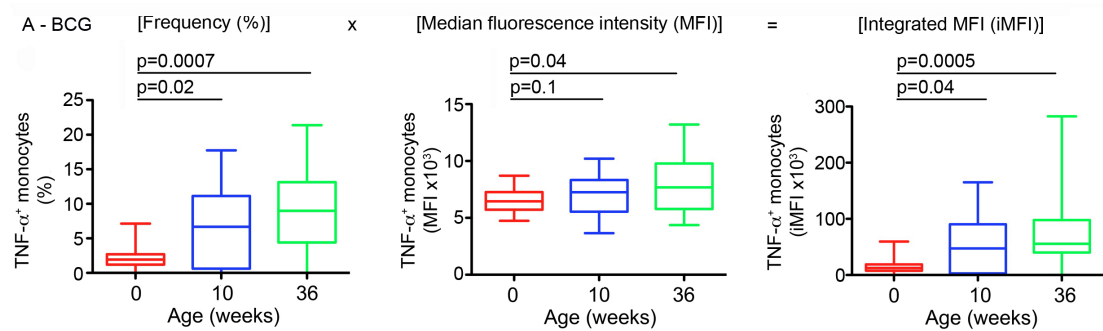

**Supplementary Figure 2: Integrated median fluorescence intensity (iMFI) of BCG-induced cytokine expressing cells.** iMFI of BCG-induced cytokine expression by innate cells was calculated by multiplying the frequency of cytokine<sup>+</sup> innate cell subsets with the MFI of cytokine<sup>+</sup> innate cell subsets for each participant. Shown are frequencies, MFI and iMFI of TNF- $\alpha$ -expressing monocytes in whole blood from newborns, 10 and 36-week old infants. Horizontal lines represent the median, boxes represent the interquartile range (IQR) and whiskers represent the range (n = 25 for each group). Group comparisons were done using the Kruskal-Wallis test (Overall effect), followed by the Mann-Whitney test.

### Supplementary Figure 3

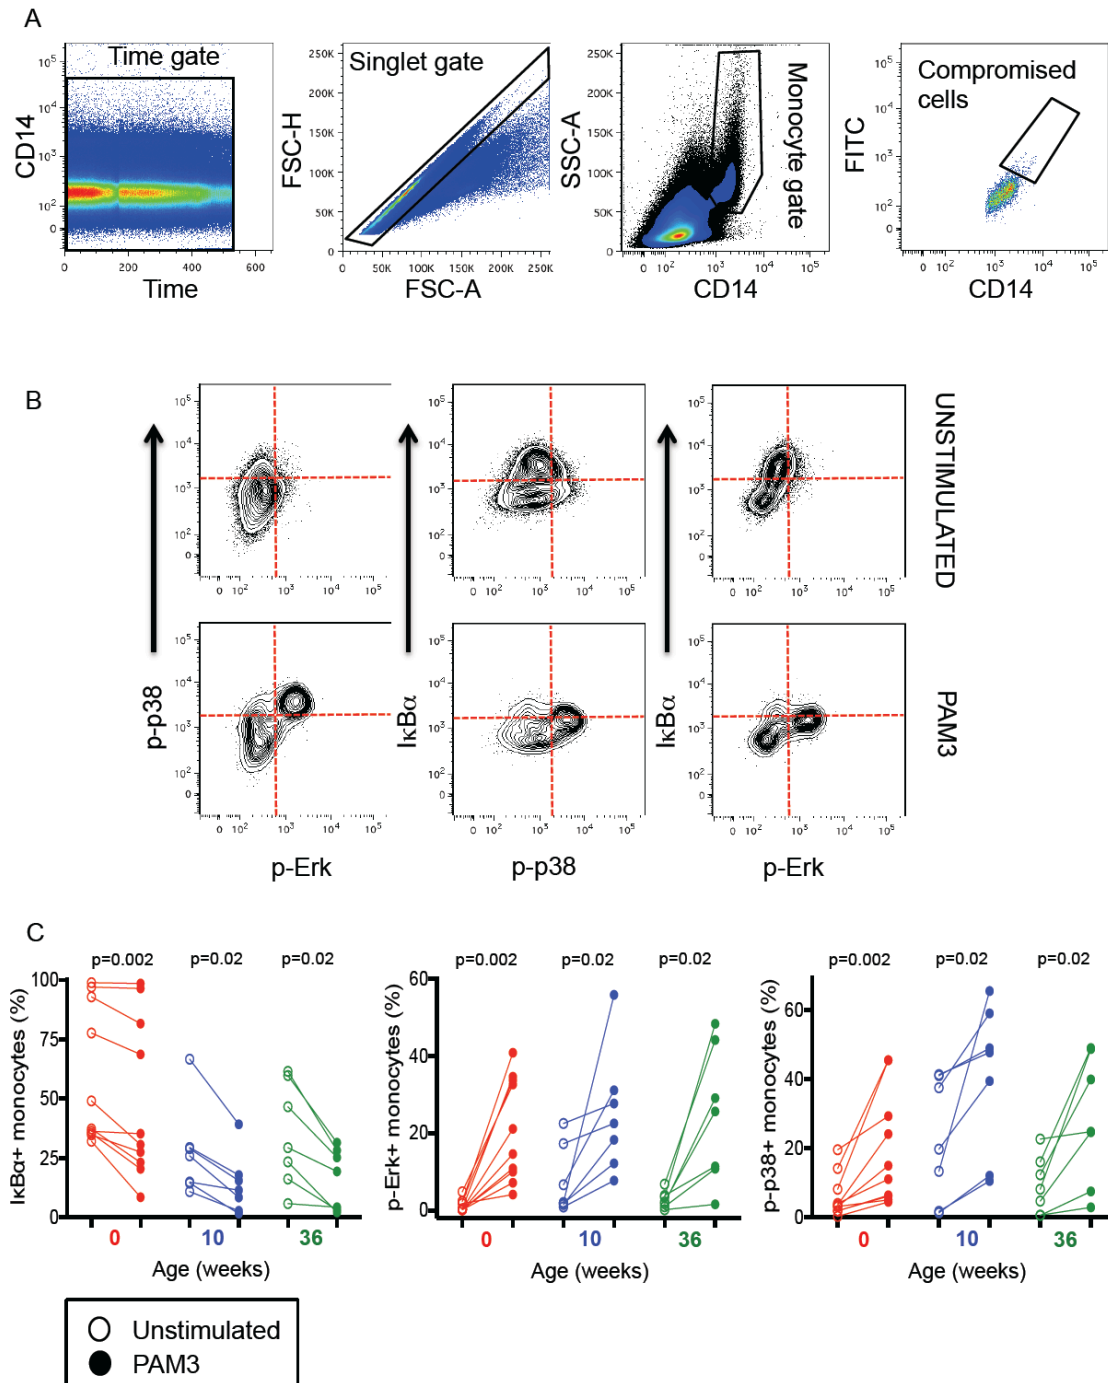

**Supplementary Figure 3: Gating strategy for monocyte signaling assay and overall response to PAM3.** Cryopreserved PBMC were thawed, rested and incubated with medium or PAM3 for 30 minutes, stained and analysed by flow cytometry. **(A)** Hierarchical gates were set as shown: time gate to ensure

uniform fluorescence over time during acquisition; singlet gate to exclude cell doublets; monocyte gate; autofluorescent, compromised cells were identified as shown and excluded from further analyses. **(B)** Representative example of activation of pro-inflammatory signaling molecules (degradation of I $\kappa$ B $\alpha$ , phosphorylation of Erk and p38) in monocytes incubated with medium (unstimulated) or PAM3. Boolean combinations of gates identifying monocytes expressing I $\kappa$ B $\alpha$ , p-Erk and p-p38 were generated to assess simultaneous activation of different signaling pathways, shown in **Fig. 7C and 7G**. **(C)** Frequencies of monocytes expressing I $\kappa$ B $\alpha$ , p-Erk and p-p38 when unstimulated (open circles) or upon PAM3 stimulation (solid circles) from newborns (red; n=10), 10-week-old (blue; n=7) and 36-week-old (green; n=7) infants. Lines connect samples from the same infants; p values were calculated using Wilcoxon matched-pairs signed rank test.
